# Supplementary material for: Ephrin-A5 potentiates netrin-1 axon guidance by enhancing Neogenin availability
Source: PubMed Central journal article supplement (PMC6700147; doi:10.1038/s41598-019-48519-0), 2019-08-19
Supplement: 41598_2019_48519_MOESM1_ESM.pdf [file 41598_2019_48519_MOESM1_ESM.pdf]

Supplementary figures for the manuscript:

Ephrin-A5 potentiates netrin-1 axon guidance by enhancing Neogenin availability.

L.-P. Croteau<sup>1,2</sup>, T.-J. Kao<sup>3,4</sup>, and A. Kania<sup>1,2\*</sup>.

<sup>1</sup>Institut de recherches cliniques de Montréal (IRCM), Montréal, QC, H2W 1R7, Canada

<sup>2</sup>Department of Anatomy and Cell Biology and Division of Experimental Medicine, McGill University, Montréal, QC, H3A 2B2, Canada

<sup>3</sup>Graduate Institute of Neural Regenerative Medicine, College of Medical Science and Technology, Taipei Medical University, Taipei 110, Taiwan

<sup>4</sup>Technology and Center for Neurotrauma and Neuroregeneration, Taipei Medical University, Taipei 110, Taiwan

\* Correspondence: [artur.kania@ircm.qc.ca](mailto:artur.kania@ircm.qc.ca)

ORCID IDs:

AK: 0000-0002-5209-2520

# Supplementary Figure 1

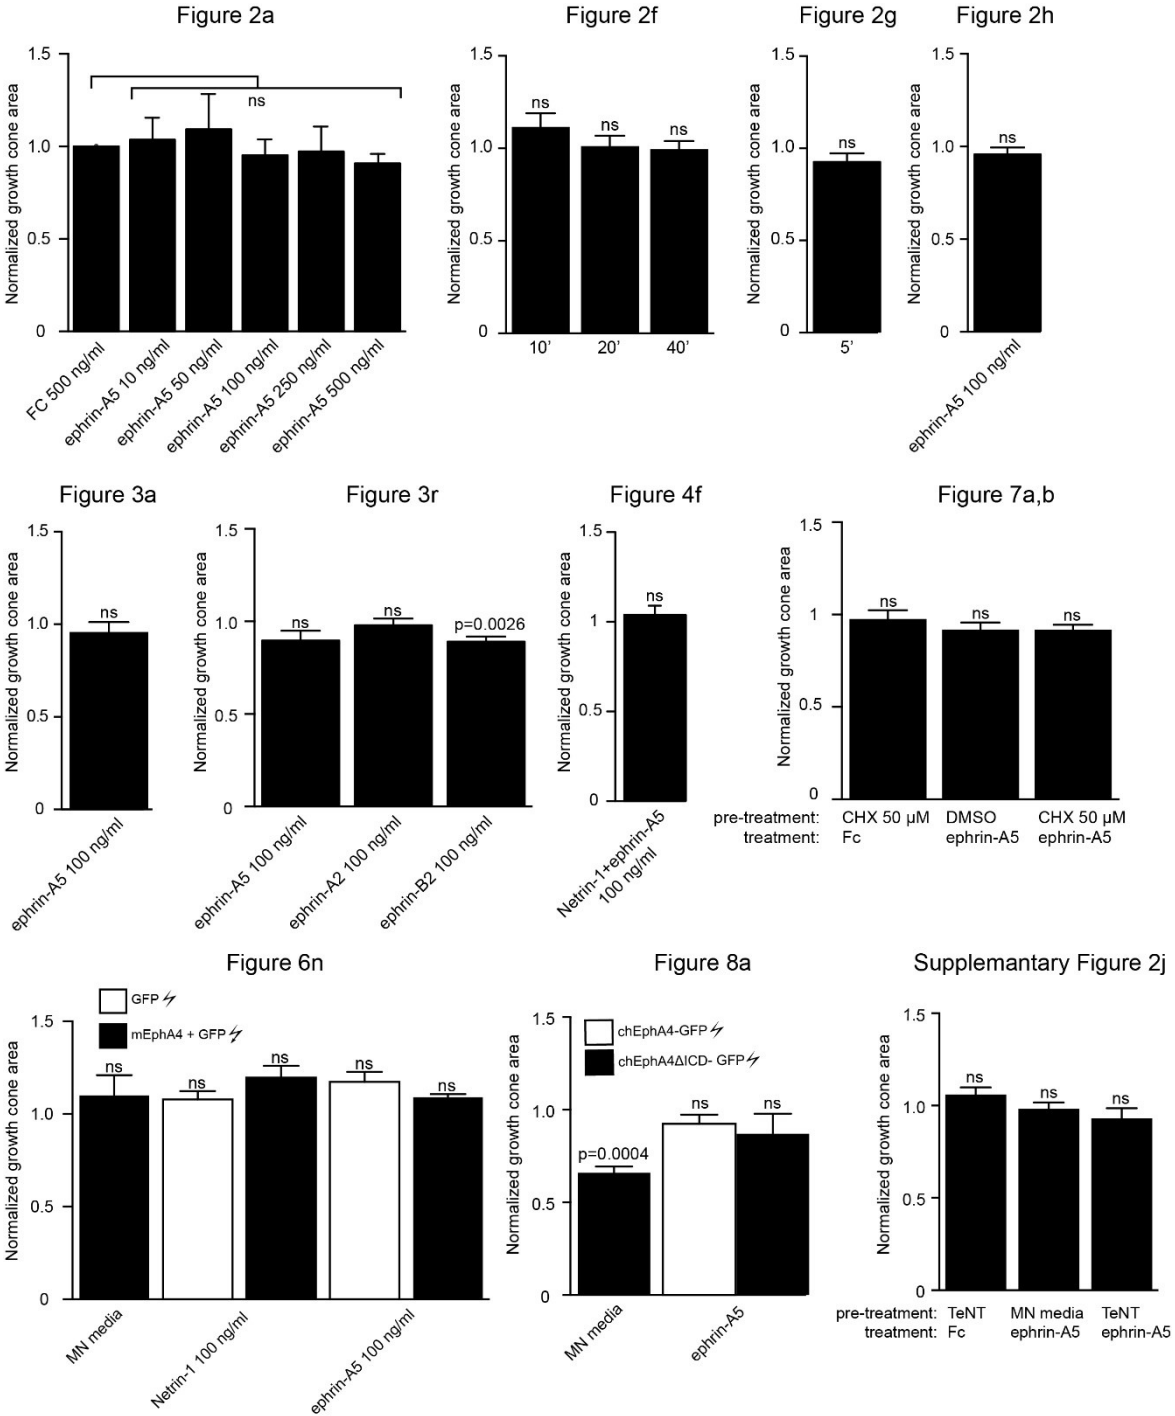

Mean area measurements of growth cones selected for IF analysis

(f) Compared to a 20' Fc 100 ng/mL treatment, ephrin-B2 100 ng/mL results in a 0.89-fold decrease in mean growth cone area (p=0.0026). (j) Compared to growth cones overexpressing EphA4-GFP, overexpression of EphA4ΔICD-GFP resulted in a 0.66-

fold decrease in mean growth cone area when treated with MN media for 20' (p=0.004). In all other instances, mean growth cone measurements did not differ from controls. (p>0.05). Data are shown as mean  $\pm$ SEM, statistical significance was tested using a two-tailed unpaired sample t-test.

## Supplementary Figure 2

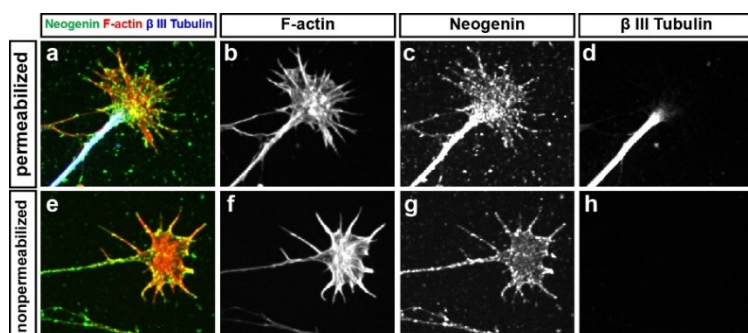

### i Neogenin IF in growth cones overexpressing mEphA4 + GFP

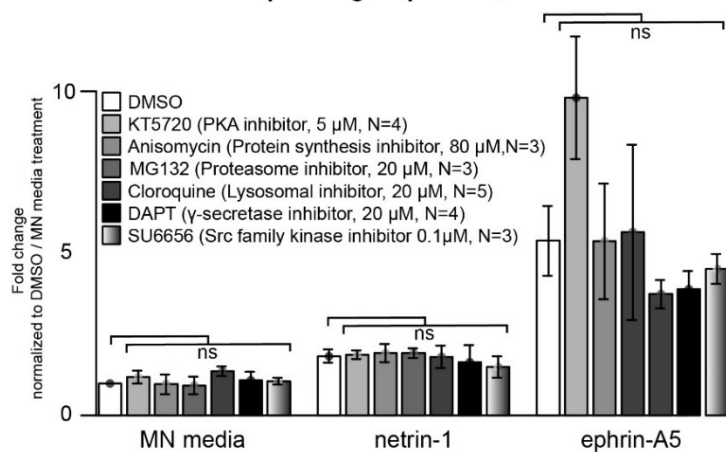

### j Neogenin IF

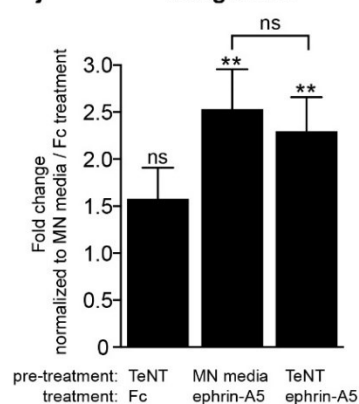

### k 20' Forskolin (10μM)

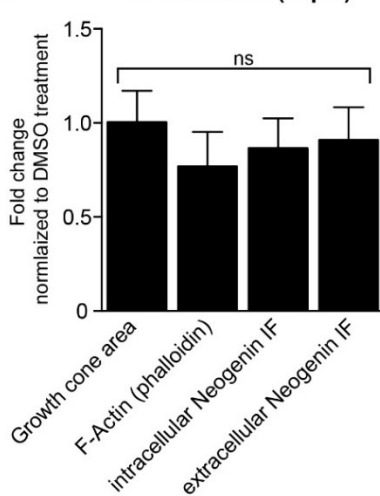

### l 20' RVKR (50μM)

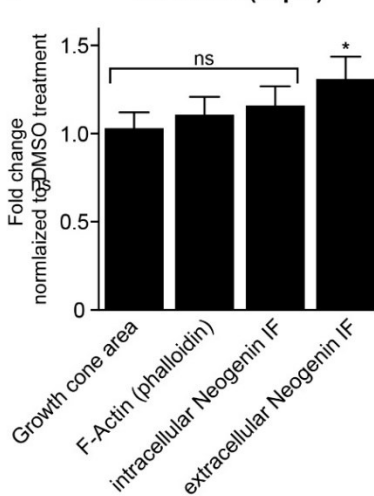

### m 20' GM6001(100μM)

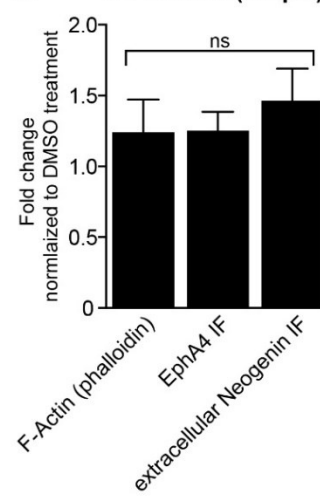

Surface enrichment of Neogenin IF and the effects of various drugs on Neogenin IF in LMC growth cones

(a-h) To confirm the surface enrichment of Neogenin when polyclonal anti-Neogenin antibody is added to live cultures (Figure 4a-c), an antibody against the intracellular protein  $\beta$ III tubulin was included in fixed (a-d) and live (e-h) cultures, secondary antibodies and phalloidin to detect F-actin were added post-fixation (a-h). (i) The ephrin-A5 induced increase in Neogenin IF prevails despite inhibiting specific cell functions. LMC explants from chick spinal cords electroporated with a GFP expression plasmid in combination with a mEphA4 expression plasmid were incubated in the presence of various drugs for 20' prior to a 20' incubation with either MN media, netrin-1 or ephrin-A5 at 100 ng/mL followed by immunostaining for Neogenin. Drug treatments failed to modify Neogenin IF in GFP+ growth cones. (j) LMC explant cultures were pretreated for 20' with tetanus toxin (TeNT, 2.87 nM) followed by a 10' treatment with either Fc or ephrin-A5 (200 ng/mL). Relative to MN media / Fc treatment, MN media / ephrin-A5 and TeNT / ephrin-A5 treatments resulted in a  $2.5 \pm 0.4$ -fold ( $p=0.004$ ) and a  $2.3 \pm 0.4$ -fold ( $p=0.005$ ) increase in Neogenin IF respectively, pretreatment with TeNT did not significantly alter Neogenin IF in ephrin-A5 treated growth cones ( $p=0.683$ ). (k-m) LMC explant cultures were treated for 20' with either the adenylate cyclase activator Forskolin (j), the proprotein convertase inhibitor RVKR (k) or the metalloprotease inhibitor GM6001(l) followed by a quantification of F-actin, EphA4 and Neogenin IF in LMC growth cones. Relative to DMSO treatment, RVKR treatment results in  $1.3 \pm 0.1$ -fold increase Neogenin IF ( $p=0.034$ ), all other measurements did not differ significantly ( $p>0.05$ ). Data are shown as mean  $\pm$ SEM, statistical significance was tested using a two-tailed unpaired sample t-test. (j) N=6 (k) N=4, (l) N=6, (m) N=5
